# Supplementary material for: Large-Scale, Three–Dimensional, Free–Standing, and Mesoporous Metal Oxide Networks for High–Performance Photocatalysis
Source: PubMed Central journal article supplement — Sci Rep. 2013 Jul 16;3:2204. doi: 10.1038/srep02204 (PMC3712314; doi:10.1038/srep02204), 2013-07-16
Supplement: srep02204-s1.pdf [file srep02204-s1.pdf]

## Supporting Information

# Large-Scale, Three-Dimensional, Free-Standing, and Mesoporous Metal Oxide Networks for High-Performance Photocatalysis

Hua Bai, Xinshi Li, Chao Hu, Xuan Zhan, Junfang Li, Yan Yan, and Guangcheng Xi\*

Inspection and Research Center of Nanomaterials and Nanoproducts, Chinese Academy of Inspection and Quarantine, No. A3, North Route, Gaobeidian, Chaoyang District, Beijing, 100123, P. R. China

\*(Guangcheng Xi) Email: xiguangcheng@caiq.gov.cn

## Supporting Figures

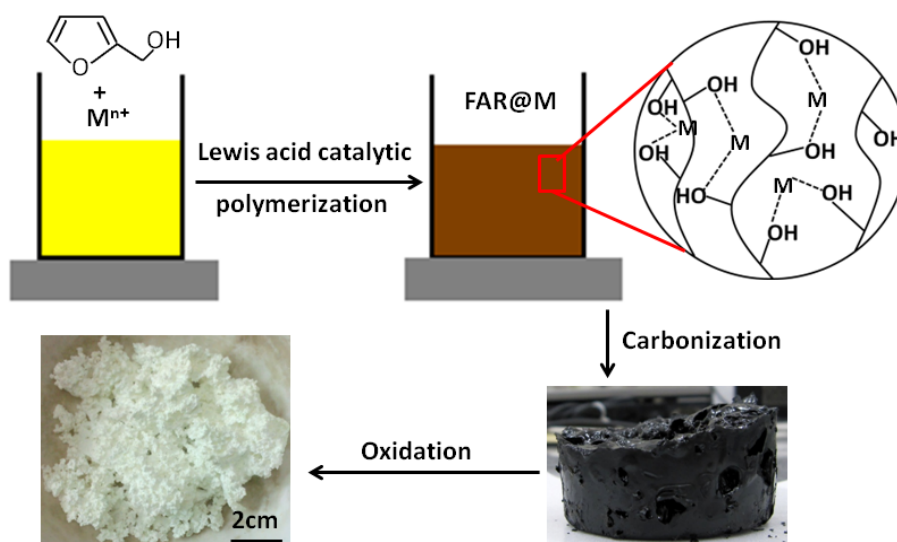

**Scheme S1.** Schematic procedure for the formation of the 3D mesoporous SnO<sub>2</sub> networks,  $M^{n+} = \text{Sn}^{4+}$ .

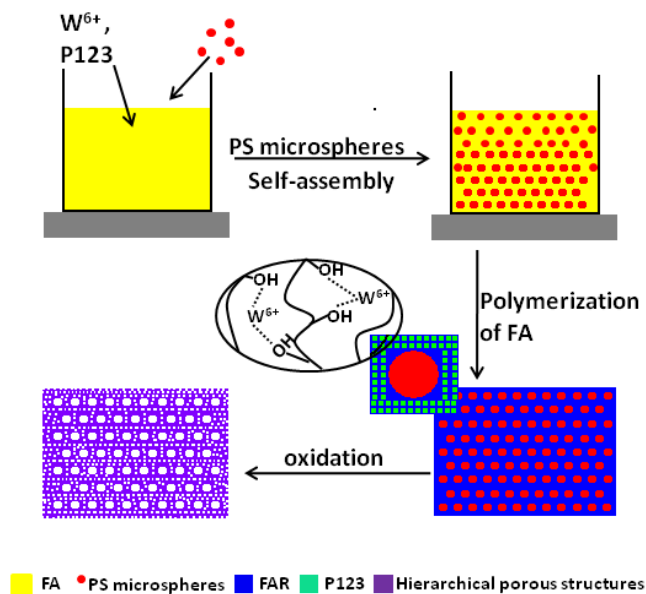

**Scheme S2.** Schematic procedure for the formation of the 3D HMM  $\text{WO}_3$  networks.

**Table 1.** The specific surface area and pore size of the samples.

| Sample                  | Phase                          | $S_{\text{BET}}^{[a]}$<br>[ $\text{m}^2\text{g}^{-1}$ ] | $r_{\text{pore}}^{[b]}$<br>[nm] | $V_{\text{pore}}^{[c]}$<br>[ $\text{cm}^3\text{g}^{-1}$ ] |
|-------------------------|--------------------------------|---------------------------------------------------------|---------------------------------|-----------------------------------------------------------|
| $\text{SnO}_2$          | rutile                         | 185                                                     | 8.3                             | 0.31                                                      |
| $\text{WO}_3$           | monoclinic                     | 130                                                     | 8.6                             | 0.14                                                      |
| $\text{Fe}_2\text{O}_3$ | $\alpha\text{-Fe}_2\text{O}_3$ | 155                                                     | 6.5                             | 0.25                                                      |
| $\text{Co}_3\text{O}_4$ | cubic                          | 170                                                     | 6.8                             | 0.29                                                      |
| $\text{NiO}$            | cubic                          | 96                                                      | 7.8                             | 0.19                                                      |
| $\text{CuO}$            | monoclinic                     | 119                                                     | 6.8                             | 0.20                                                      |
| $\text{CeO}_2$          | cubic                          | 114                                                     | 7.9                             | 0.22                                                      |

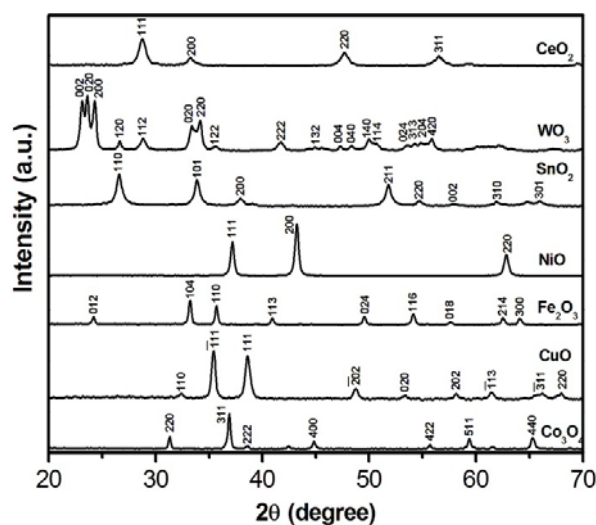

**Figure S1.** XRD patterns of the as-synthesized samples, including  $\text{CeO}_2$ ,  $\text{WO}_3$ ,  $\text{SnO}_2$ ,  $\text{Fe}_2\text{O}_3$ ,  $\text{NiO}$ ,  $\text{Co}_3\text{O}_4$ ,  $\text{CuO}$ .

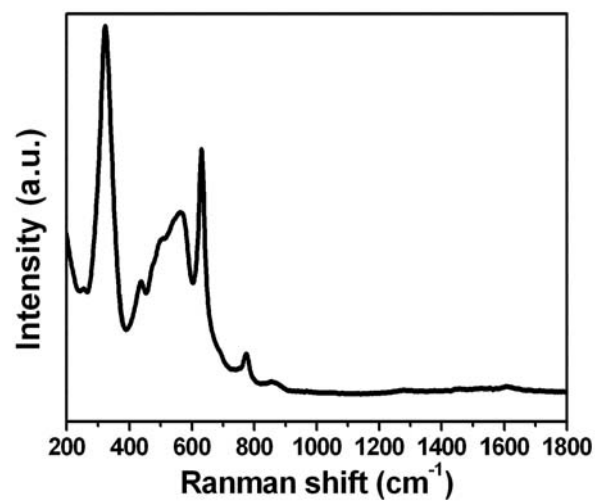

**Figure S2.** Raman spectrum of the as-synthesized 3D porous SnO<sub>2</sub> networks.

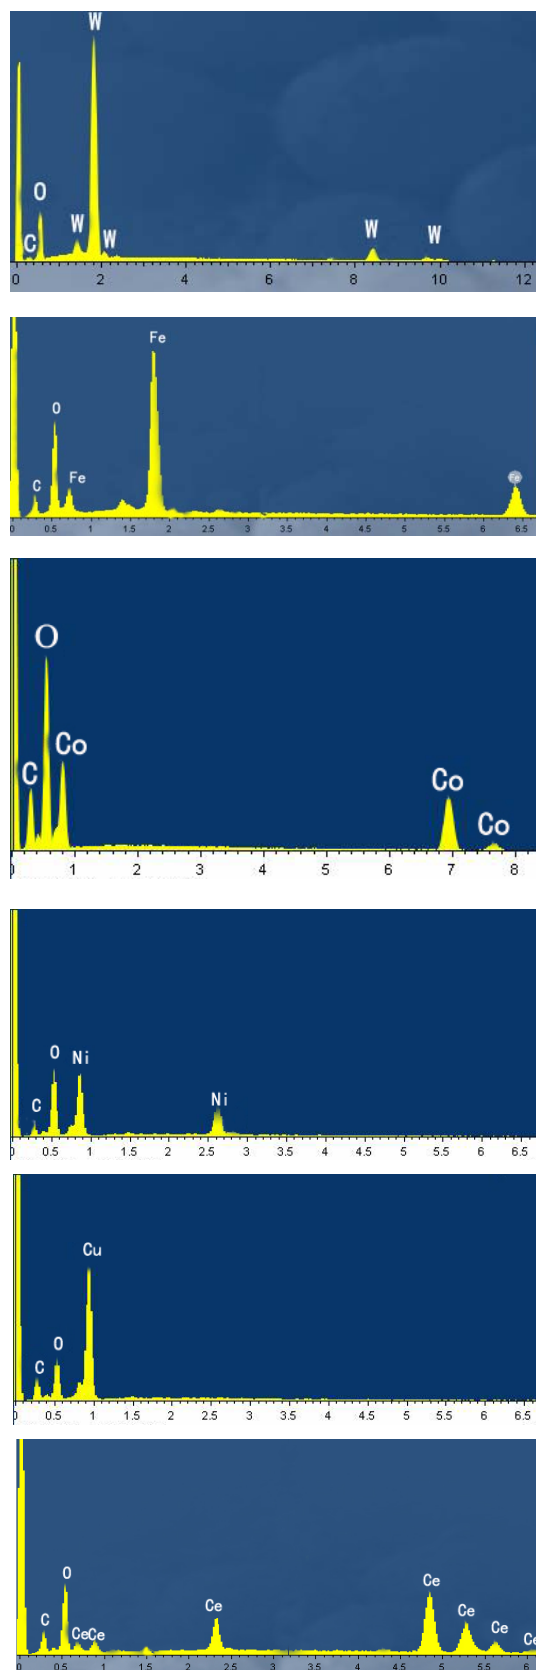

**Figure S3.** The energy–dispersion X–Ray spectroscopy (EDS) of the as-synthesized WO<sub>3</sub>, Fe<sub>2</sub>O<sub>3</sub>, Co<sub>3</sub>O<sub>4</sub>, NiO, CuO, and CeO<sub>2</sub>.

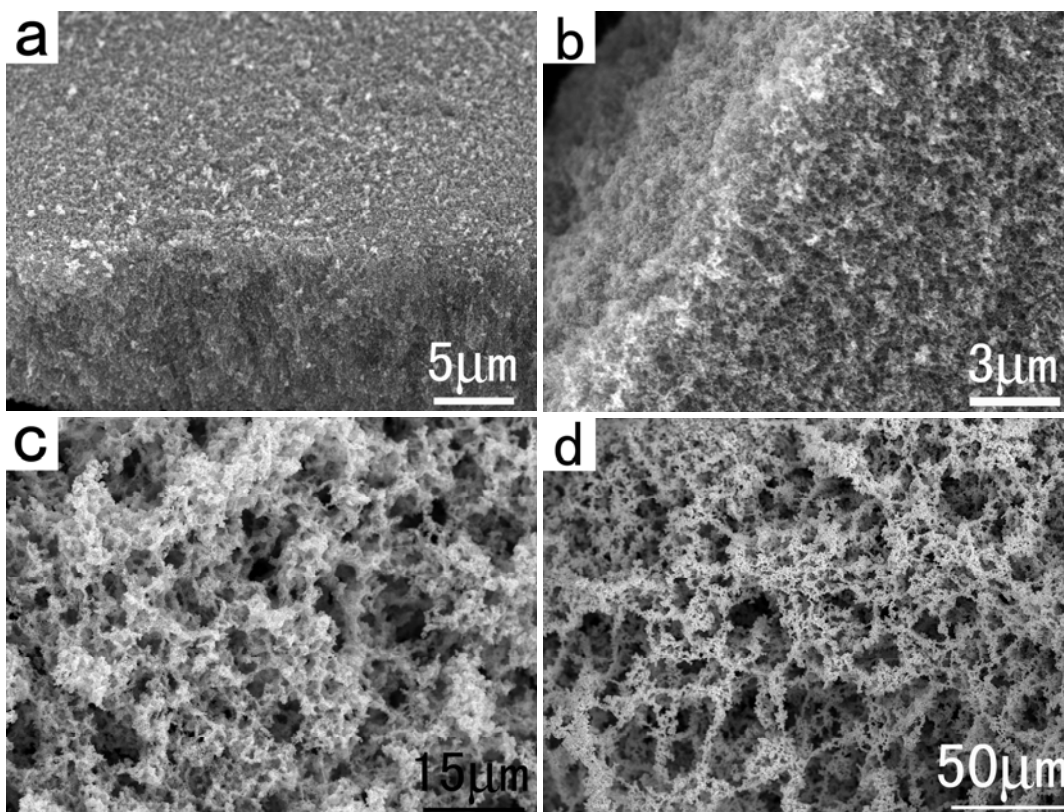

**Figure S4.** The typical SEM images of the free-standing 3D porous  $\text{WO}_3$  networks obtained with different amount of FA: (a) 15 mL, (b) 25 mL, (c) 35 mL, and (d) 45 mL.

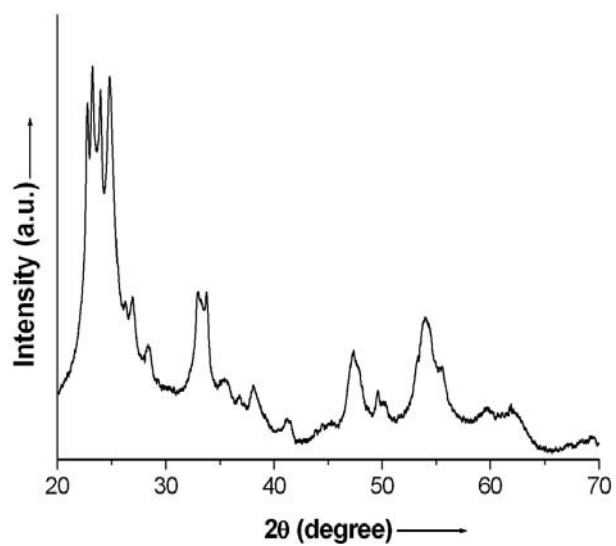

**Figure S5.** XRD pattern of the as-synthesized 3D mesoporous  $\text{TiO}_2/\text{WO}_3$  hybrid networks.

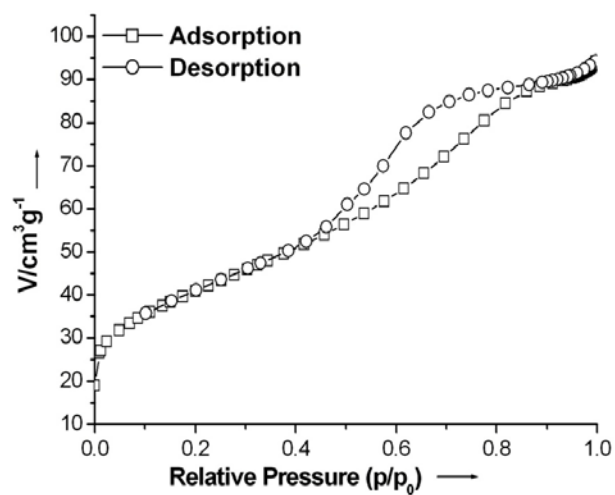

**Figure S6.** Nitrogen adsorption–desorption isotherm plot for the 3D mesoporous  $\text{TiO}_2/\text{WO}_3$  networks. Inset: Barrett–Joyner–Halenda (BJH) pore–size distribution plot of the 3D mesoporous  $\text{TiO}_2/\text{WO}_3$  sample.

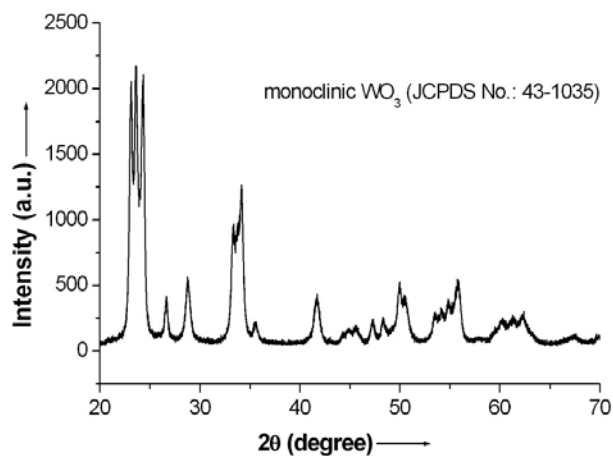

**Figure S7.** The typical XRD pattern of the as–obtained 3D macro/mesoporous  $\text{WO}_3$  sample.

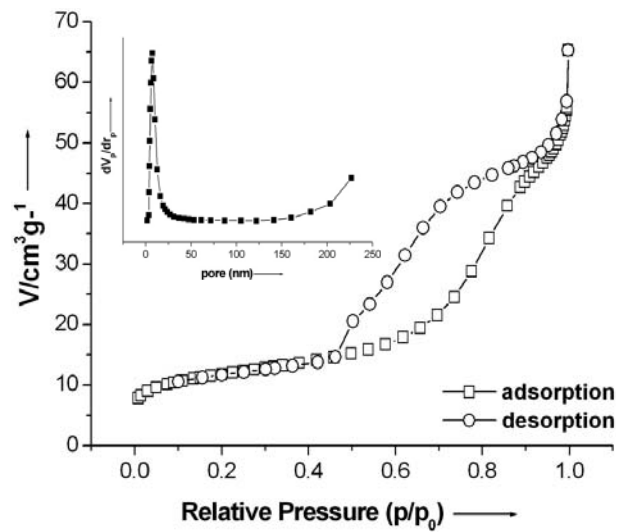

**Figure S8.** Nitrogen adsorption–desorption isotherm plot of the 3D macro/mesoporous  $\text{WO}_3$  sample. Inset: Barrett–Joyner–Halenda (BJH) pore–size distribution plot of the 3D macro/mesoporous  $\text{WO}_3$  sample.

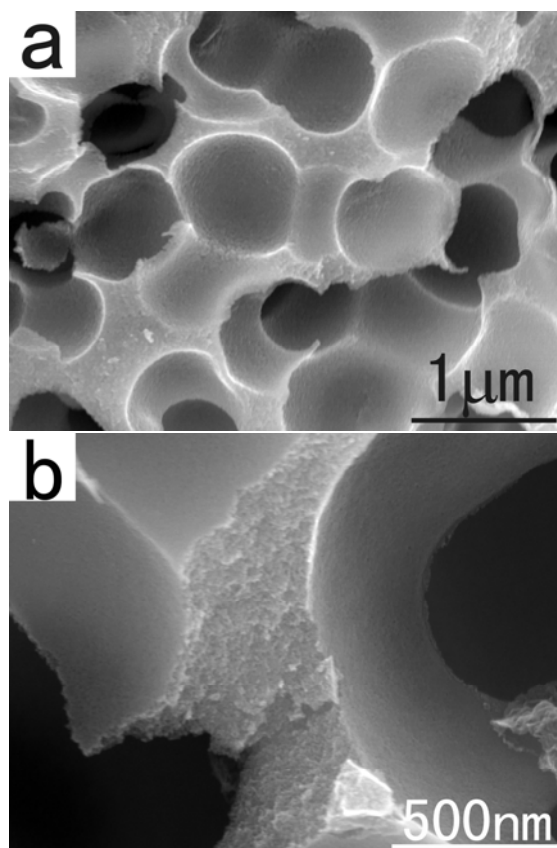

**Figure S9.** SEM images of the HMM  $\text{WO}_3$  networks with thick walls.

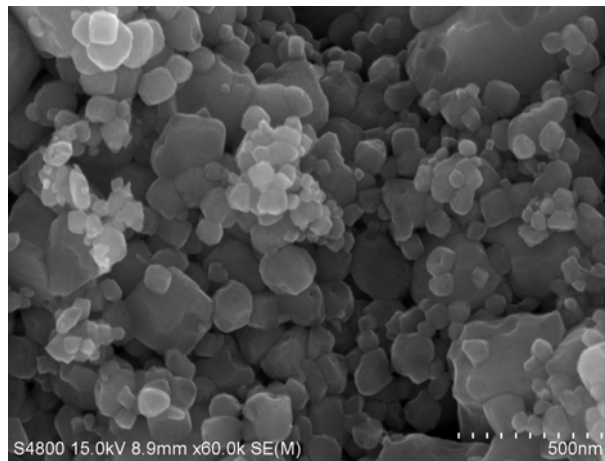

**Figure S10.** SEM image of the commercial WO<sub>3</sub> particles.

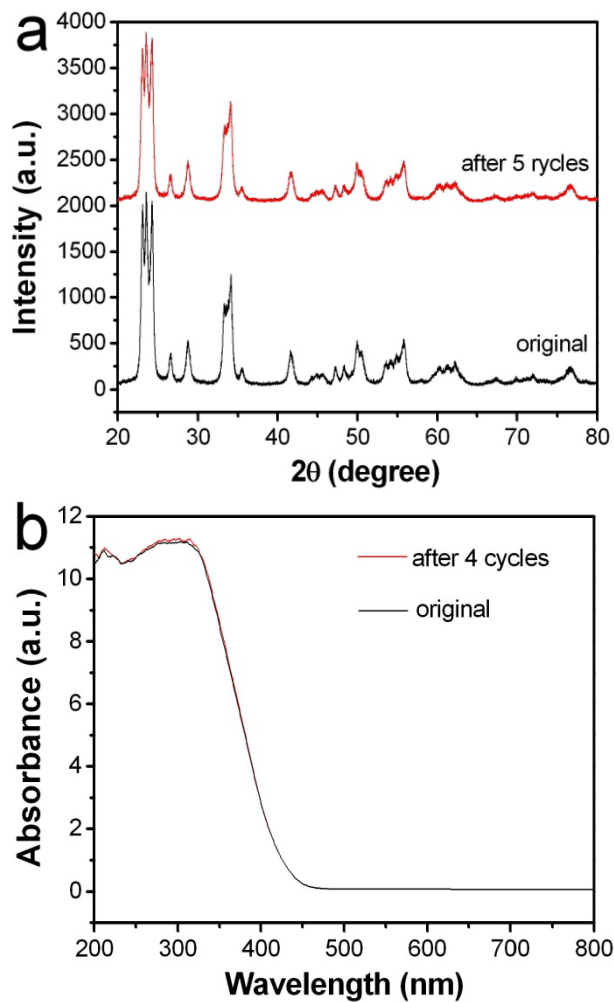

**Figure S11.** XRD pattern (a) and UV-vis absorption spectra (b) of the samples after photocatalytic degradation reactions.



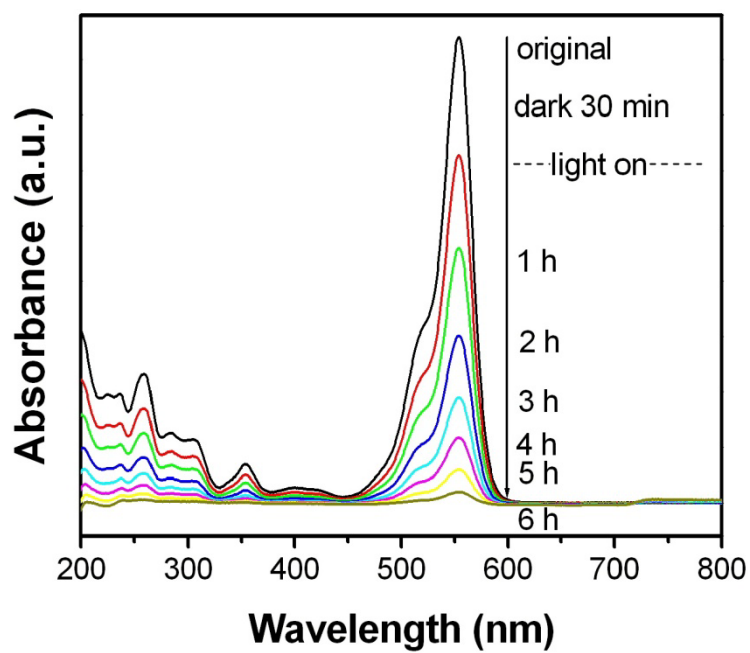

**Figure S12.** UV/Vis spectroscopic changes of an aqueous solution of RhB upon visible-light irradiation in the presence of the 3D mesoporous  $\text{WO}_3$  nanomaterials. Reaction conditions: RhB concentration 10 mg/L, catalyst concentration 0.5 g/L, initial pH 6.85, sunlight with a reaction temperature of 30 °C.
